# Supplementary material
Source: publisher site journal article supplement (https://www.dovepress.com/article/282128)
Supplement: Supplementary file 1 [file get_supplementary_file.php]

Celecoxib exerts a therapeutic effect against demyelination by improving the immune and inflammatory microenvironments

**Supplementary materials**

**Supplementary Table S1. Primer sequences for qRT-PCR.**

| Gene | GenBank | Sequence |
| --- | --- | --- |
| *β-actin* | NM_131031 | Forward: 5’-TTCACCACCACAGCCGAAAGA-3’  Reverse: 5’-TACCGCAAGATTCCATACCCA-3’ |
| *arg1* | NM_001045197 | Forward: 5’-ACACACCTTTAACCACACCGACTG-3’  Reverse: 5’-CCTTTCCTTTATGCTCCC-3’ |
| *caspase-3* | NM_131877 | Forward: 5’-TGTTCTTTATTCAGGCTTGT-3’  Reverse: 5’-CACTGCCATACTTTGTCATC-3’ |
| *caspase-7* | NM_001020607 | Forward: 5’-AGCAATGCCCATCAAGA-3’  Reverse: 5’-ATCGTCAAACTCCGAACCC-3’ |
| *cox-2* | NP_059334 | Forward: 5’-ACTACCCCTGAGCTTCTCACA-3’  Reverse: 5’-GATGCTGTTGATGATATCCCAGATTG-3’ |
| *il-10* | NM_001020785 | Forward: 5’-TTCTGCTCTGCTCACGCTTC-3’  Reverse: 5’-AGCCCTCCACAAATGAGCAA-3’ |
| *il-12* | NM_001007108 | Forward: 5’-GTGCCAGTGATCTGTGGAGAAGC-3’  Reverse: 5’-CACCGTCACCGTAATCCTGTTTCC-3’ |
| *il-1β* | NM_212844 | Forward: 5’-TTCTGCTCAGCCTGTGTGTTTGG-3’  Reverse: 5’-AGATGTGGAGCGGAGCCTTCG-3’ |
| *il-4* | NM_001170740 | Forward: 5’-TCTCTGCCAAGCAGGAATGG-3’  Reverse: 5’-CCAGTCCCGGTATATGCTGC-3’ |
| *il-6* | NM_001261449 | Forward: 5’-ACGGAAAGATGTCTAACGC-3’  Reverse: 5’-ATAGGGAAGTGCTGGATG-3’ |
| *Mbp* | XM_002665561 | Forward: 5’-AAAATCCCTGAACCAACC-3’  Reverse: 5’-CCTTTCCTTTATGCTCCC-3’ |
| *mrc1* | XM_002662968 | Forward: 5’-CTCCACCAACTACCGTAACCCAAG-3’  Reverse: 5’-GAACGAGCGAGCATCTTCCATAGG-3’ |
| *tnf-α* | NM_212859 | Forward: 5’-TACCGCTGGTGATGGTGT-3’  Reverse: 5’-TGATTGCCCTGGGTCTTA-3’ |


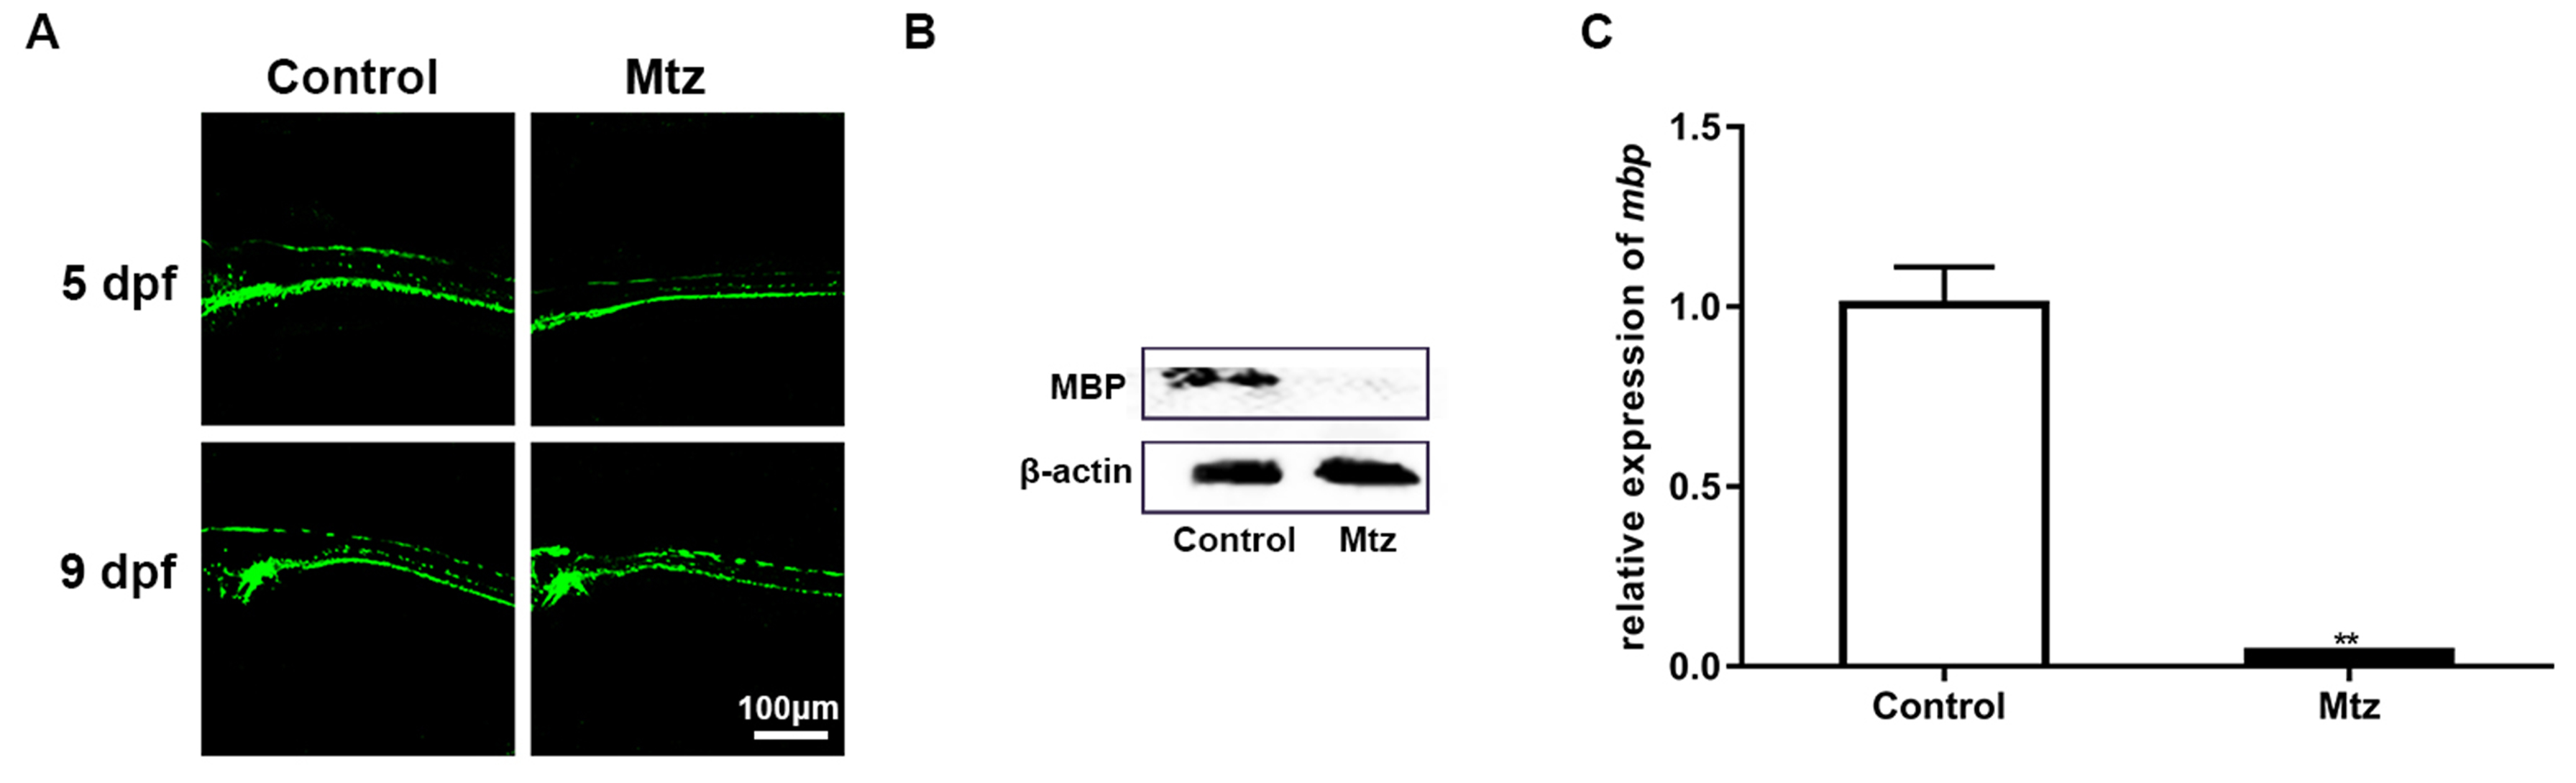


**Supplementary Figure S1. Mtz induction specifically depletes oligodendrocytes in Tg (*mbp:nfsB-egfp*) larvae.**

(**A**) GFP-positive signals in spinal cords from control and Mtz-induced fish. (**B**) The expression of MBP protein, as analyzed by western blotting. (**C**) Relative *mbp* mRNA expression. Note that *mbp* expression was decreased in the Mtz-induced group compared to the control group (Student’s t-test). Abbreviation: dpf, days post fertilization. **, *P*<0.01.

**
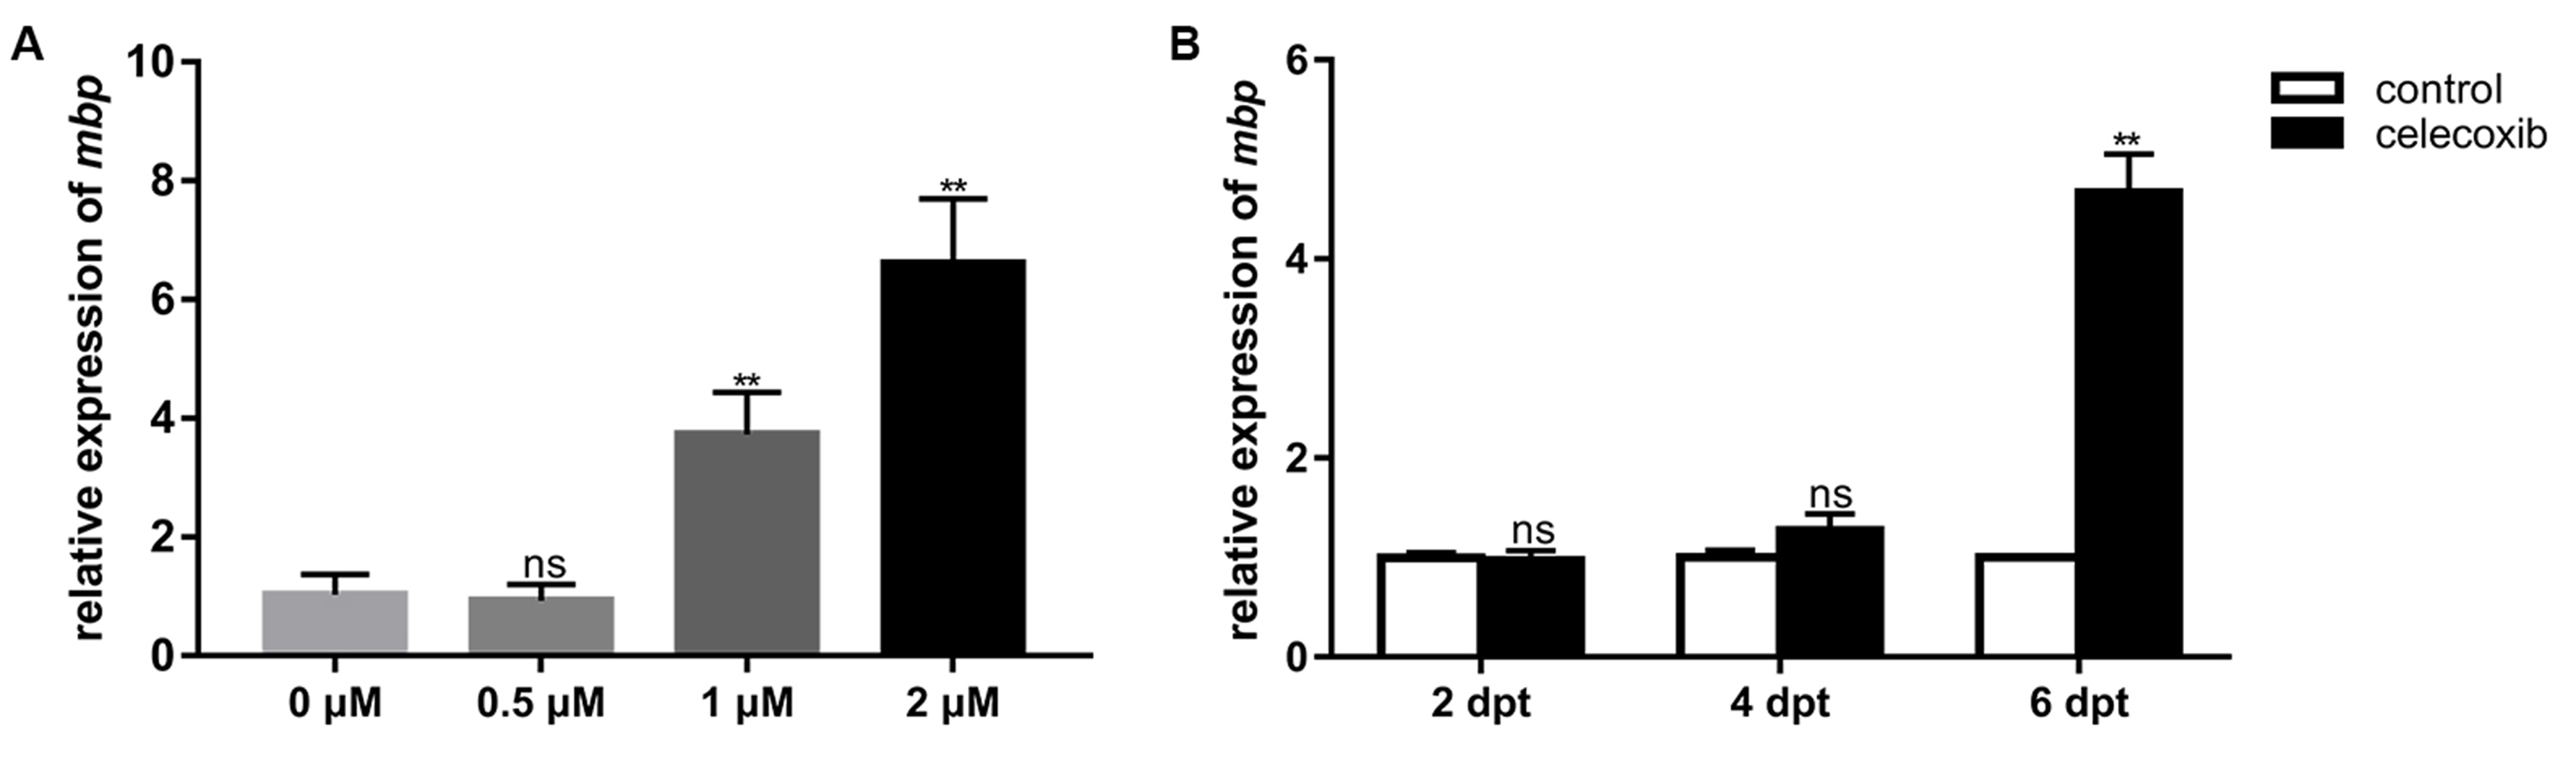
**

**Supplementary Figure S2. *mbp* mRNA expression in demyelinated adult zebrafish treated with celecoxib.**

(**A**) Relative *mbp* mRNA expression following 6 days of treatment with different concentrations (0, 0.5, 1 and 2 μM) of celecoxib. Note the significant increase in the 1 and 2 μM-treated groups compared to the 0 and 0.5 μM-treated groups (ANOVA). (**B**) Relative *mbp* mRNA expression follow treatment with 2 μM celecoxib for different durations. Note that the expression level increased significantly at 6 days post treatment (dpt; ANOVA). Abbreviations: dpt, days post treatment; ns, not significant. **, *P*<0.01


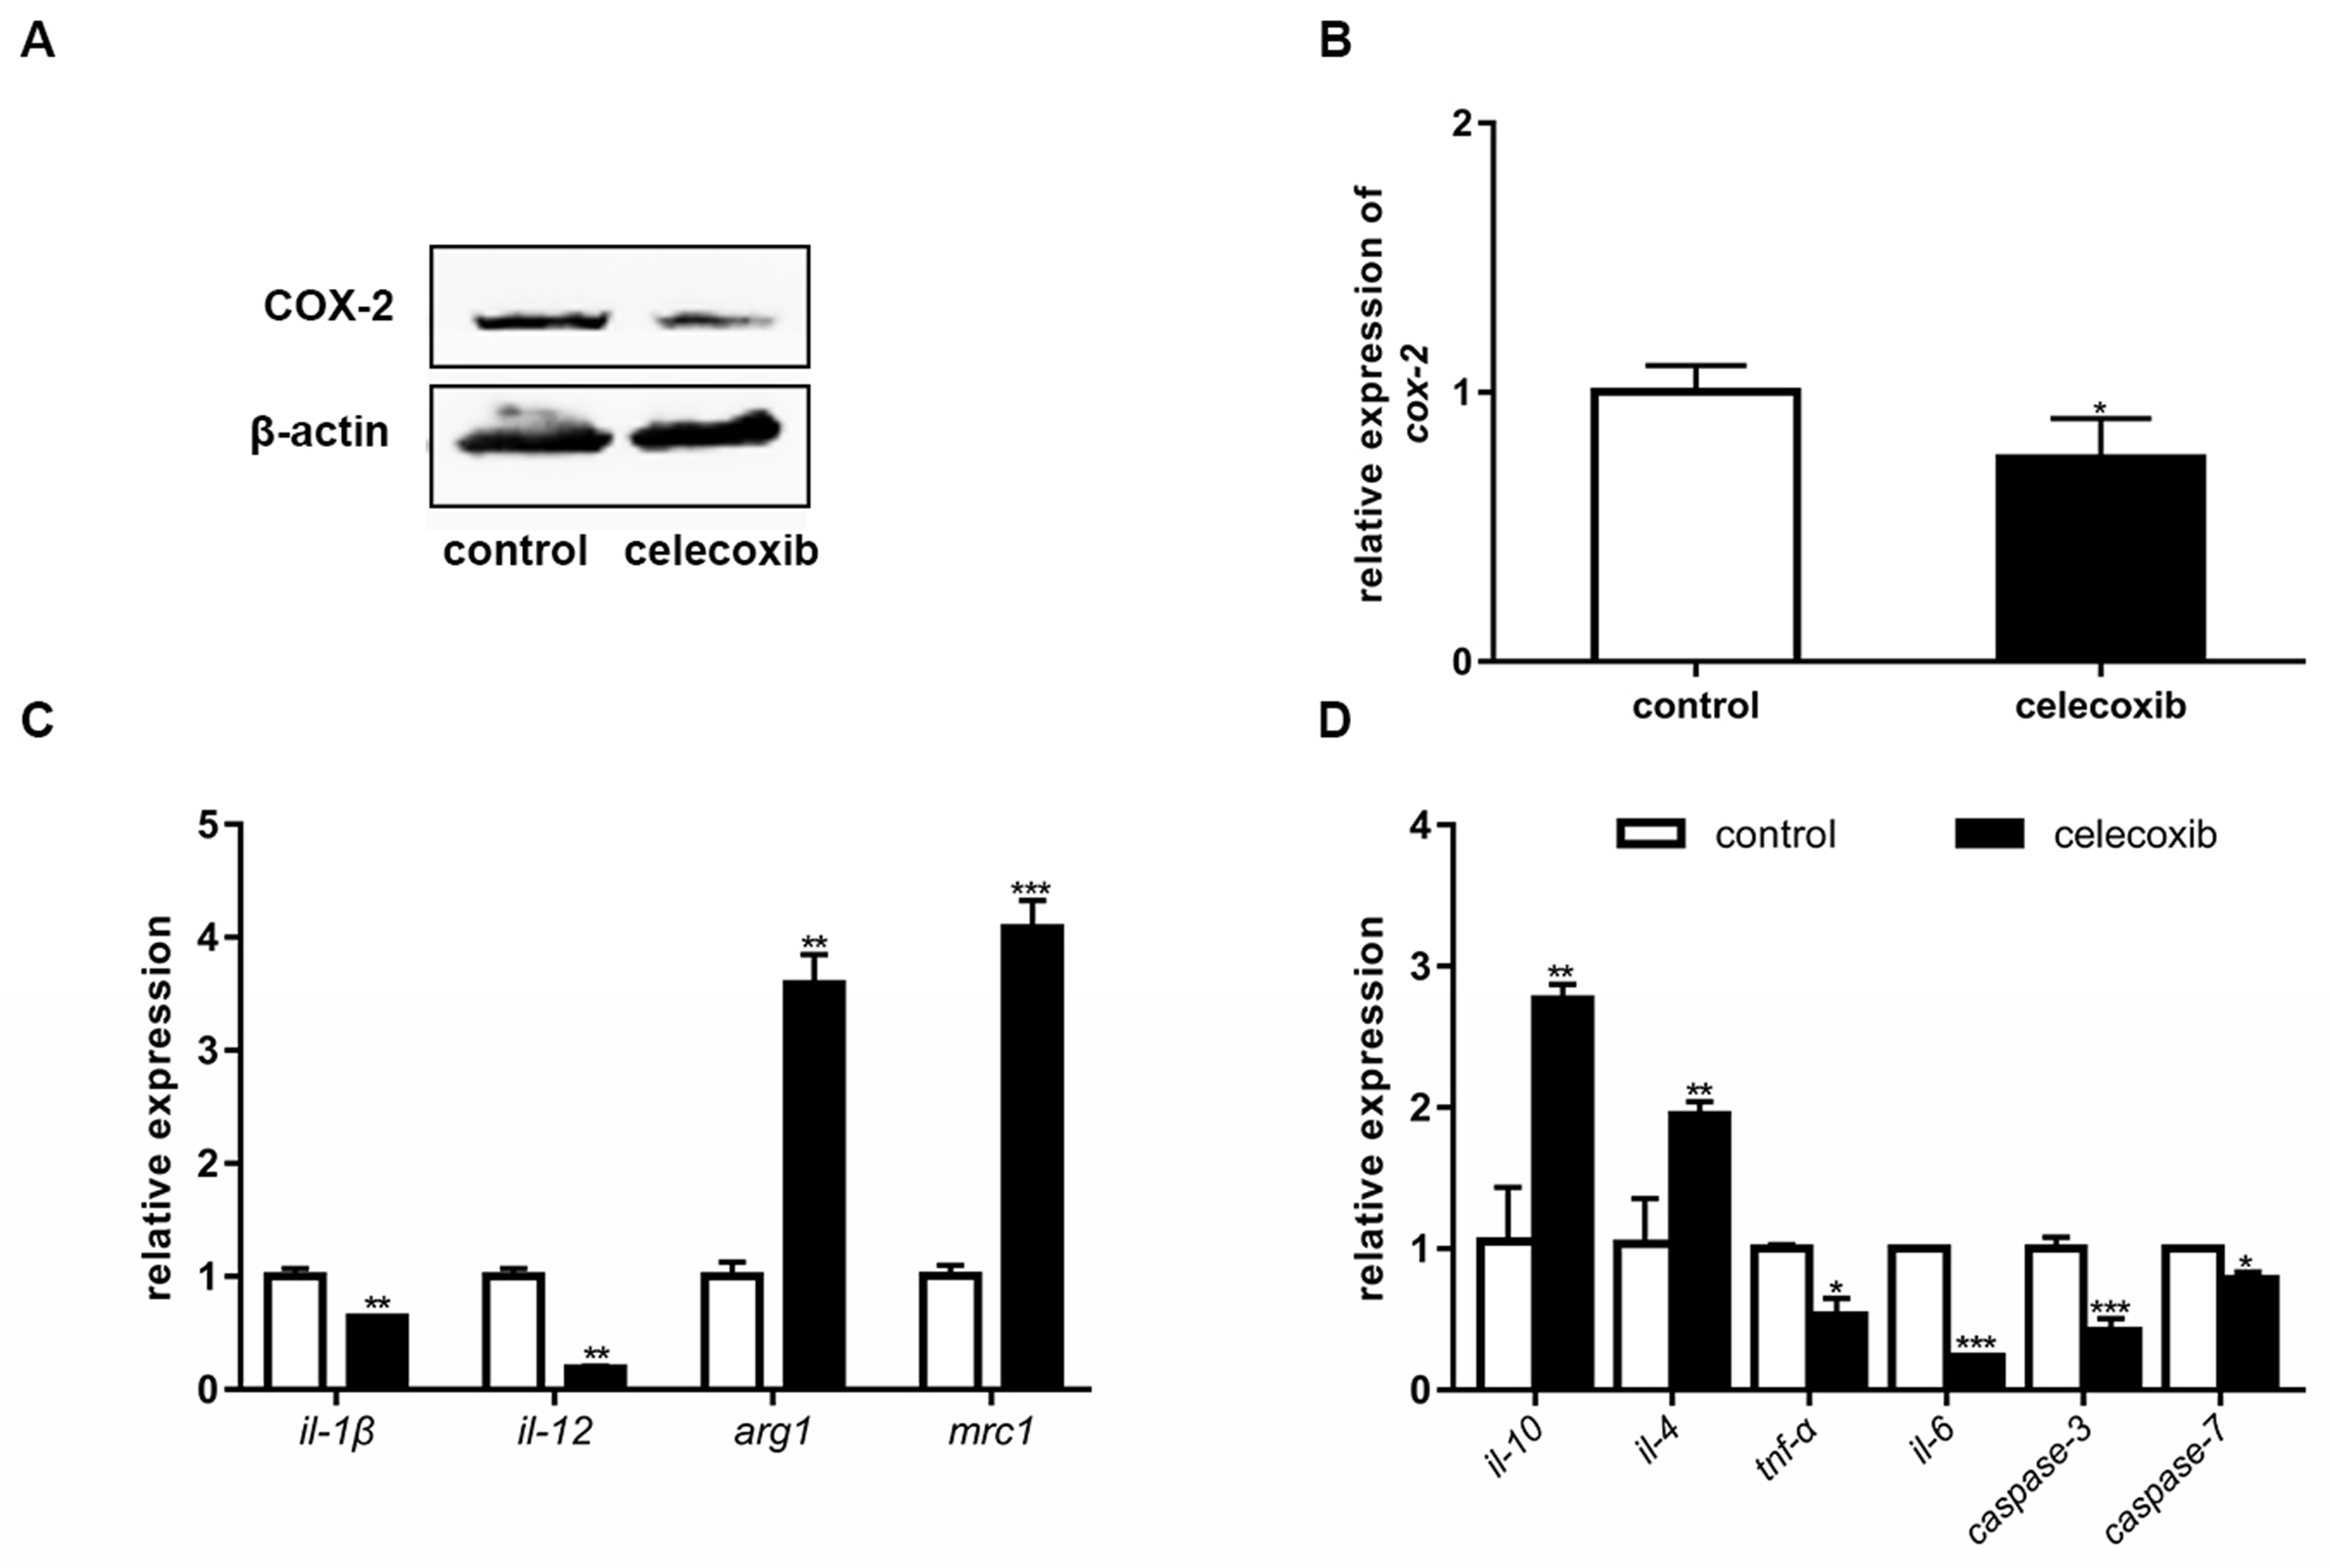


**Supplementary Figure S3. The expression of COX-2, microglia/macrophage markers, inflammatory mediators and apoptotic factors in larvae following celecoxib treatment.**

(**A**) The expression of the COX-2 protein, as analyzed by western blotting, at 3 dpt. (**B**) Relative expression *of cox*-2 mRNA (Student's t-test). (**C**) Relative expression of the microglia/macrophage markers *il-1β*, *il-12*, *arg1* and *mrc1* (Student's t-test). (**D**) Statistical analysis of mRNA expression of *il-10*, *il-4*, *tnf-α*, *il-6*, *caspase-3* and *caspase-7* between the control and celecoxib-treated groups (Student’s t-test). *, *P* < 0.05; **, *P* < 0.01; ***, *P* < 0.001.
